# Supplementary material for: Comparison of Antimycotic Activity of Originator and Generics of Voriconazole and Anidulafungin against Clinical Isolates of Candida albicans and Candida glabrata
Source: MDPI journal article supplement (doi:10.3390/jof8020195), 2022-02-17
Supplement: s1 [file s1]

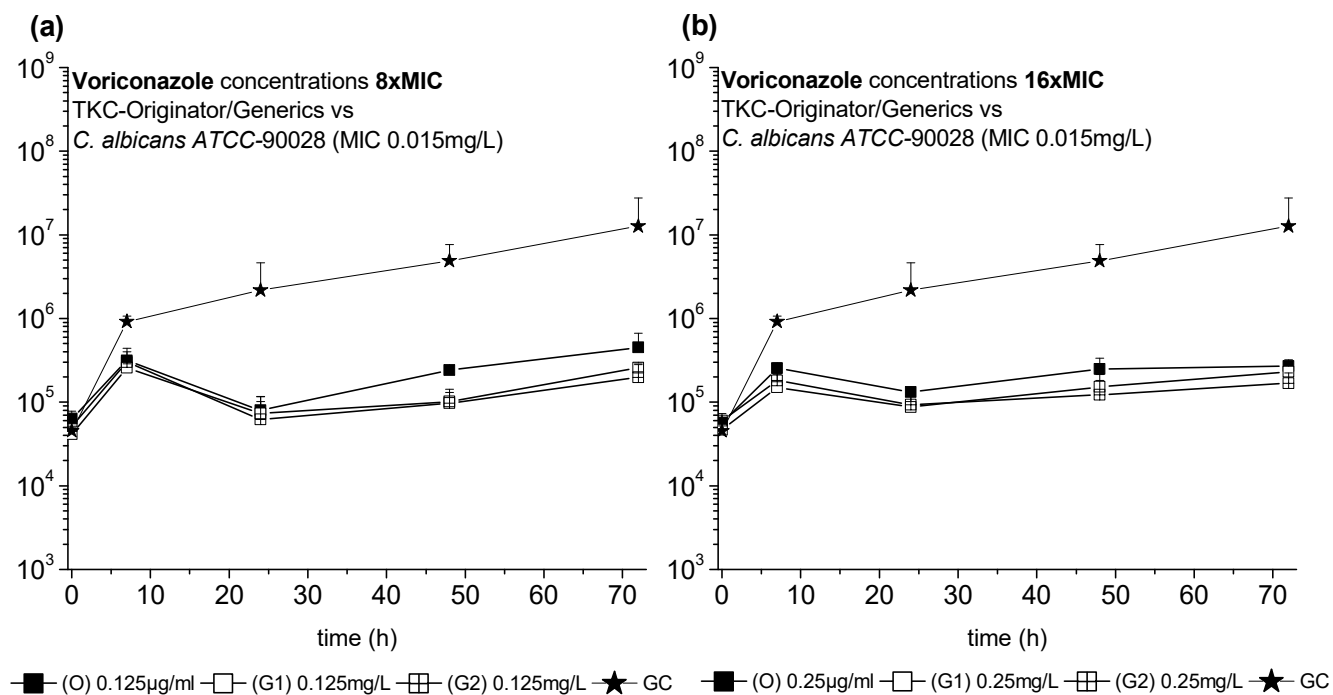

**Figure S1:** TKC of voriconazole against *C. albicans* tested with **originator (O)** from Pfizer (**black symbols**), **generic-1 (G1)** from Strada (**white symbols**), **generic-2 (G2)** from Ratiopharm (**crossed symbols**) with concentrations 0.125mg/L **(a)** and 0.25mg/L **(b)** over 72 hours are shown. Standard deviations are given. Additionally, the **growth control (GC)** is depicted with **star symbols**.

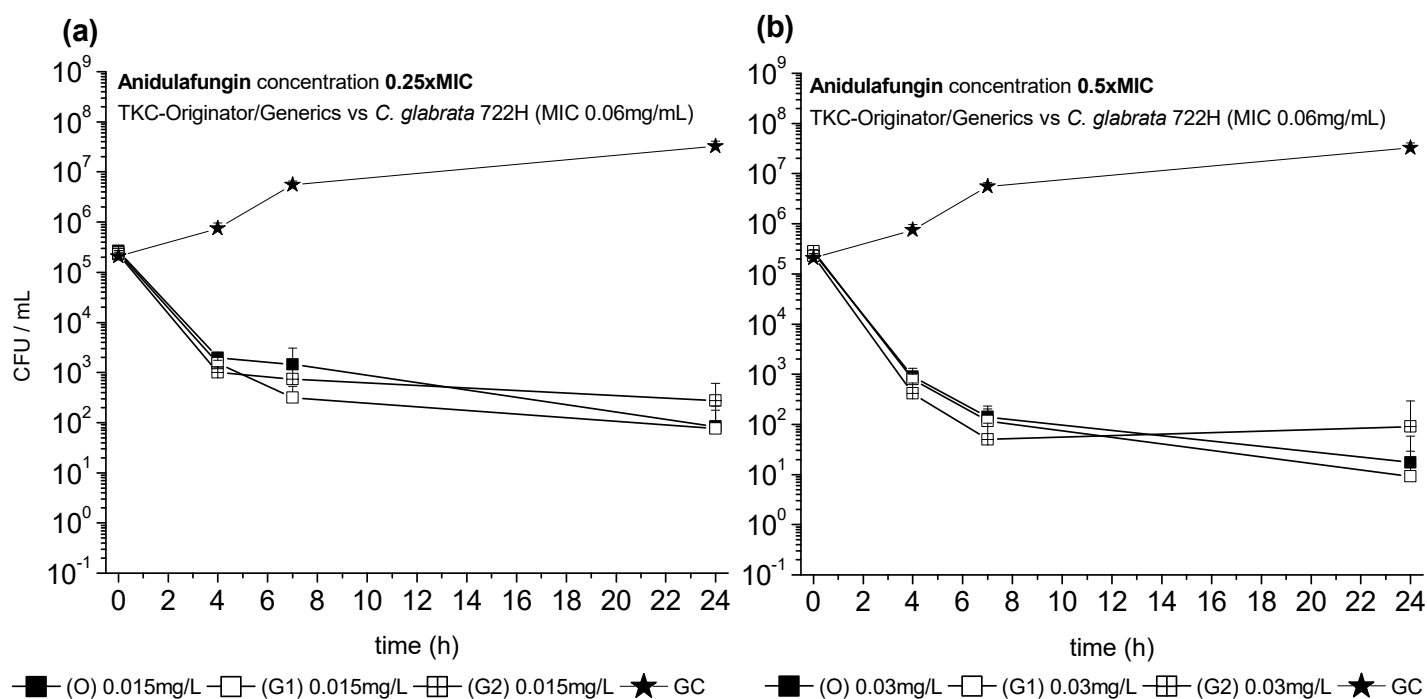

**Figure S2:** TKC of anidulafungin against *C. glabrata* tested with **originator (O)** from Pfizer (**black symbols**), **generic-1 (G1)** from Strada (**white symbols**), **generic-2 (G2)** from Pharmore (**crossed symbols**) with concentrations 0.015mg/L **(a)** and 0.03mg/L **(b)** over 24 hours are shown. Standard deviations are given. Additionally, the **growth control (GC)** is depicted with **star symbols**.
