# Supplementary material for: Comparison of Antimycotic Activity of Originator and Generics of Voriconazole and Anidulafungin against Clinical Isolates of Candida albicans and Candida glabrata
Source: MDPI journal article supplement (doi:10.3390/jof8020195), 2022-02-17
Supplement: s1 [file s1]

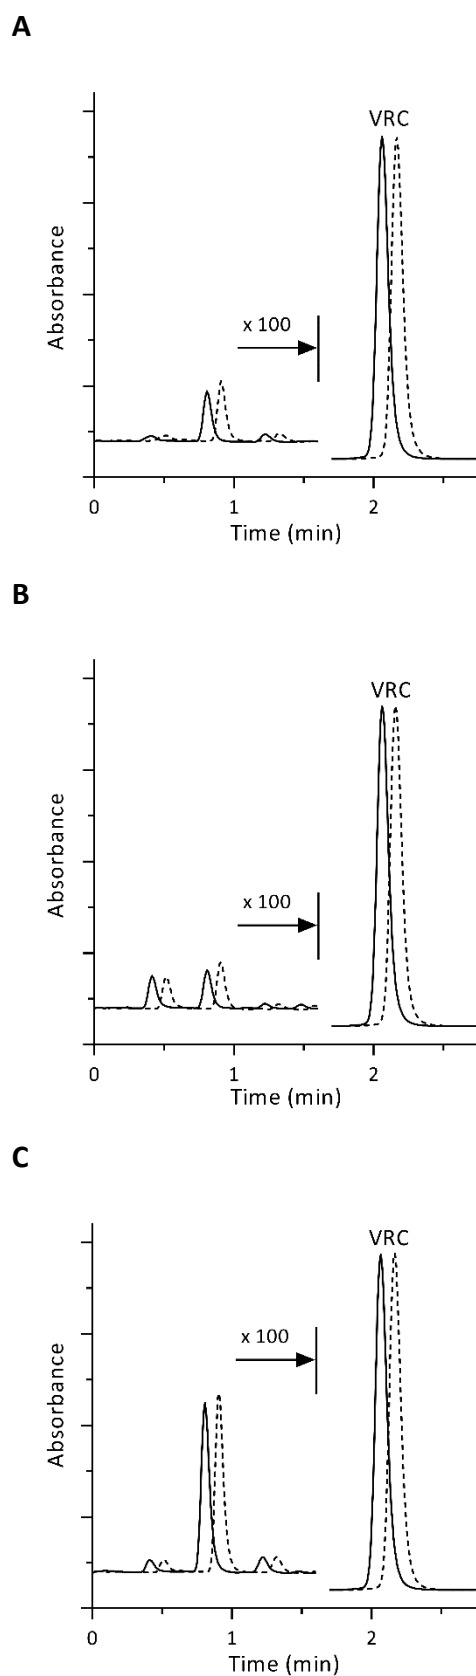

**Suppl. Figure S3:** Chromatograms of voriconazole (VRC) in aqueous solutions of (A) VFEND® from Pfizer and generics from (B) Stada and (C) Ratiopharm at baseline (solid lines) and after 24 h of storage at room temperature (dashed lines). The chromatographic signal has been amplified by factor 100 until 1.7 minutes to visualize peaks deriving from (nonquantifiable) traces of unknown by-products (content <1%).
