# Supplementary material for: Comparison of Antimycotic Activity of Originator and Generics of Voriconazole and Anidulafungin against Clinical Isolates of Candida albicans and Candida glabrata
Source: MDPI journal article supplement (doi:10.3390/jof8020195), 2022-02-17
Supplement: s1 [file s1]

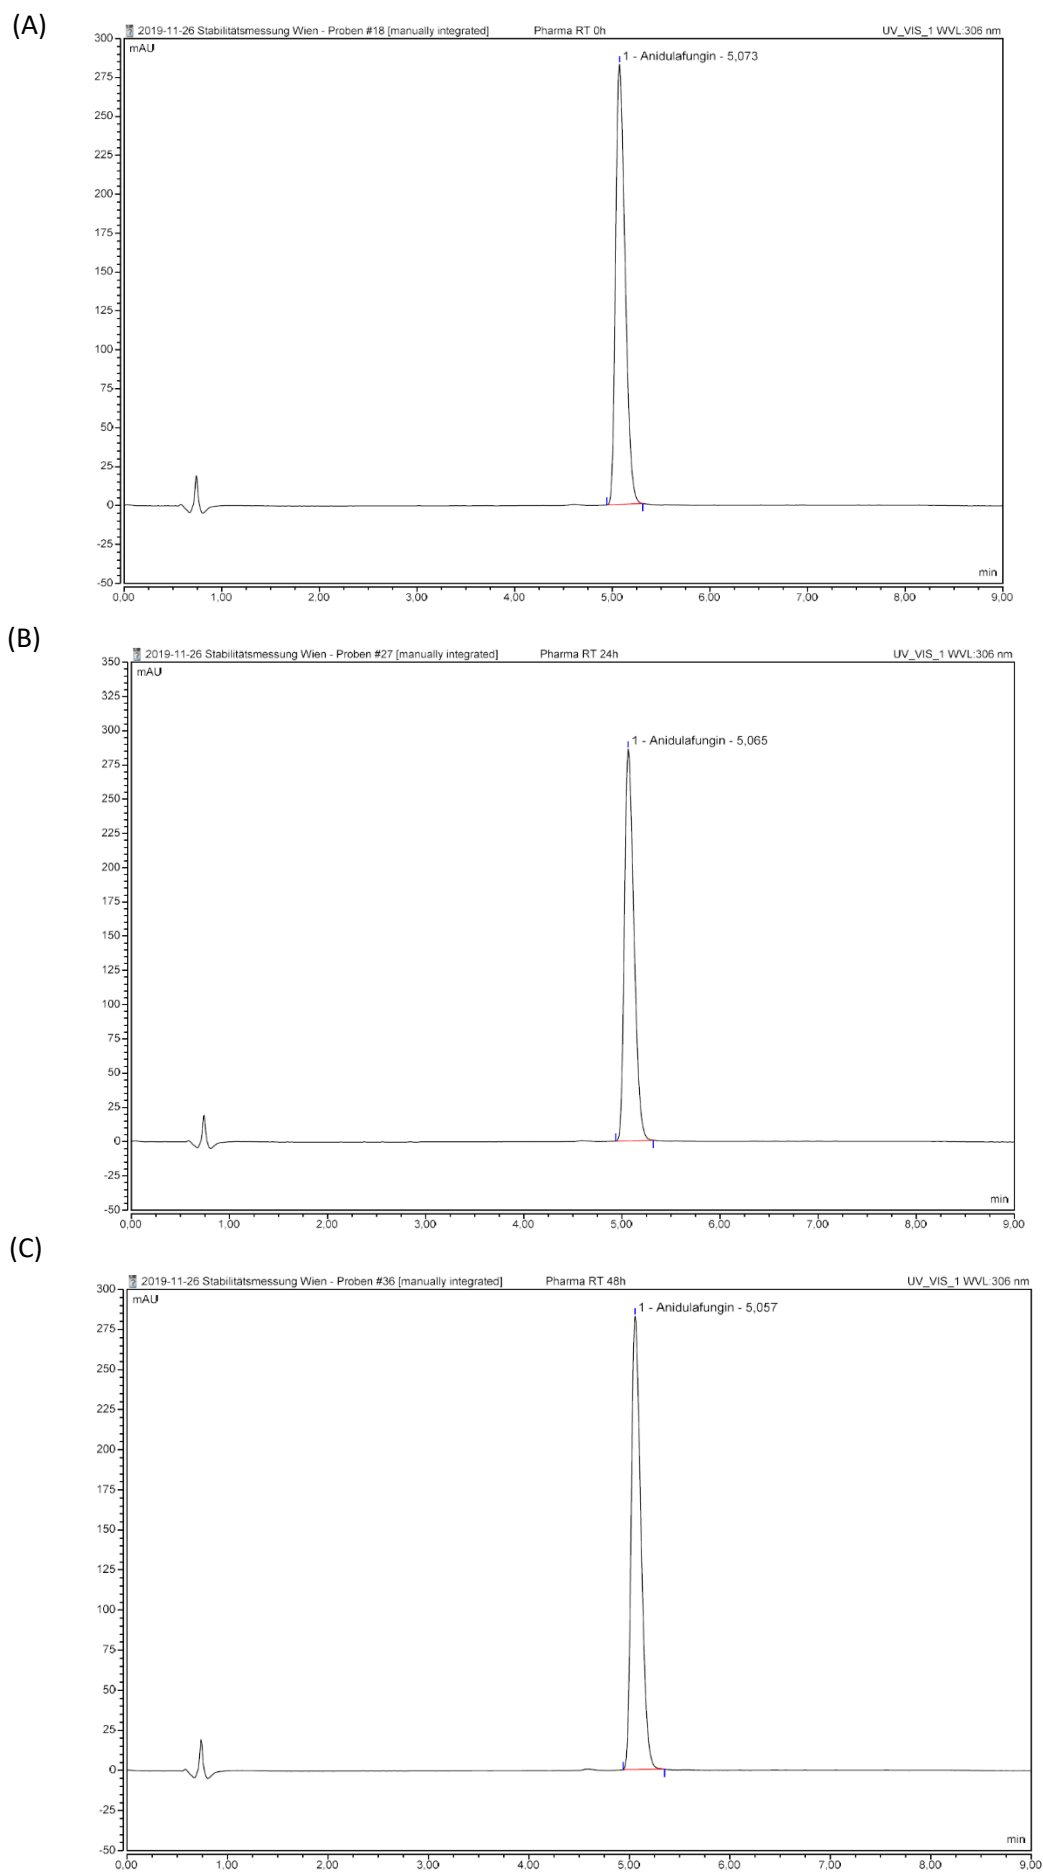

**Suppl. Figure S4.2:** Chromatograms of anidulafungin in aqueous solutions from Pharma at (A) baseline, (B) after 24 h and (C) after 48h of storage at room temperature. The small peak shown is derived from (nonquantifiable) traces of unknown by-products (content <1%).
