# Supplementary material for: Comparison of Antimycotic Activity of Originator and Generics of Voriconazole and Anidulafungin against Clinical Isolates of Candida albicans and Candida glabrata
Source: J Fungi (Basel). 2022 Feb 17;8(2):195. doi: 10.3390/jof8020195 (PMC8879245; doi:10.3390/jof8020195)
Supplement: Supplementary file 1 [file jof-08-00195-s001.zip]

Archive with 5 entries (5 files):
- Supplement-Fungi-Generics-MDPI-Fungi-S1 and S2.pdf
- Supplement-Fungi-Generics-MDPI-Fungi-S3.pdf
- Supplement-Fungi-Generics-MDPI-Fungi-S4.1.pdf
- Supplement-Fungi-Generics-MDPI-Fungi-S4.2.pdf
- Supplement-Fungi-Generics-MDPI-Fungi-S4.3.pdf
